# Supplementary material
Source: PubMed Central journal article supplement (PMC3902009)
Supplement: NIHMS543954-supplement-supplement_1.pdf [file NIHMS543954-supplement-supplement_1.pdf]

Supplementary Figure 1. Properties of the protein deposition onto the cell culture substratum. A: A range of concentrations of Alexa 594-conjugated secondary antibody were printed on NHS-derivatized glass slide. After being in contact with the surface for several hours and a wash, the intensity of fluorescence, which corresponds to protein concentration level on spots, was measured by a GenePix 4000B ; B: Printing of four different concentration of Alexa 488-conjugated secondary antibody (green): at 0.001; 0.01; 0.1; 1 mg/ml along with the same Alexa 594-conjugated secondary antibody (red) at the constant concentration of 1 mg/ml was performed to test the competition for available NHS-derivatized surface. The strips indicate the fluorescence of Alexa 488 only (upper), Alexa 594 only (middle) and both dyes (lower), prior (left panels) and following (right panels) a wash. The results for Alexa 488 fluorescence intensity are quantified in the graphs.

Supplementary Figure 2. Difference cell types tested using the system combining dielectrophoresis-assisted microfluidics with protein micro-arraying for cell signaling studies (top panel: A549 Cells, bottom panel: iHUVCEs).

Supplementary Figure 3. iHUVCEs' gradual response to increasing concentration of immobilized TNF $\alpha$ .

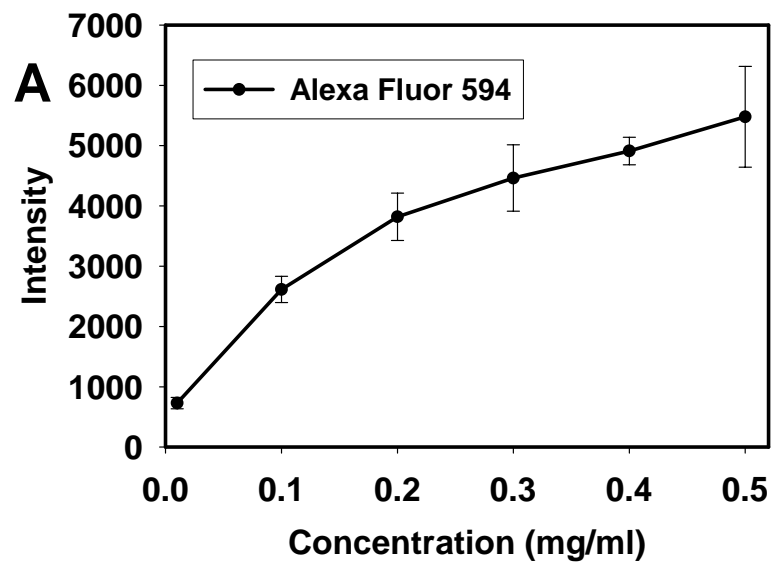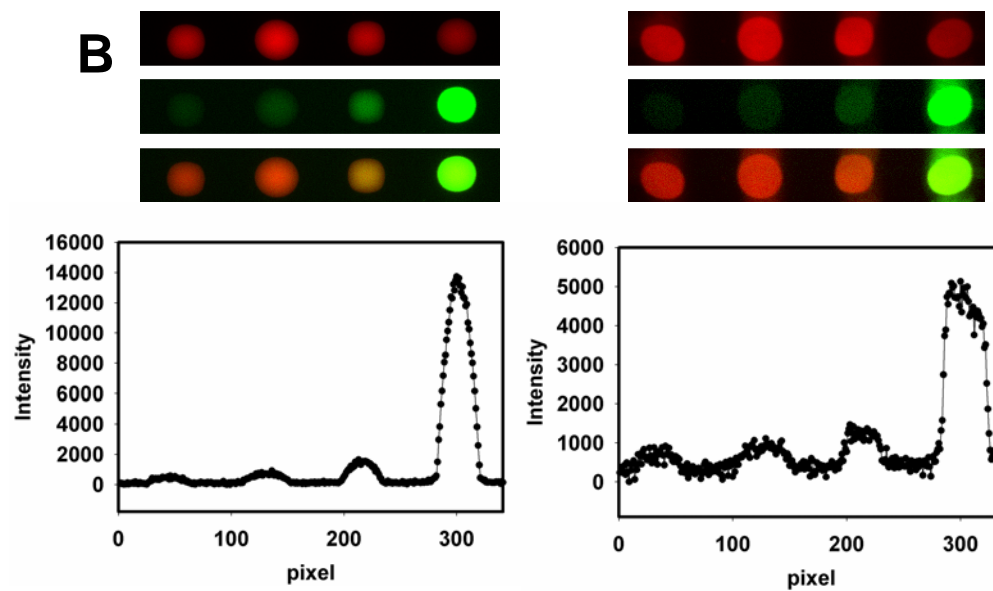

Suppl. Fig.1

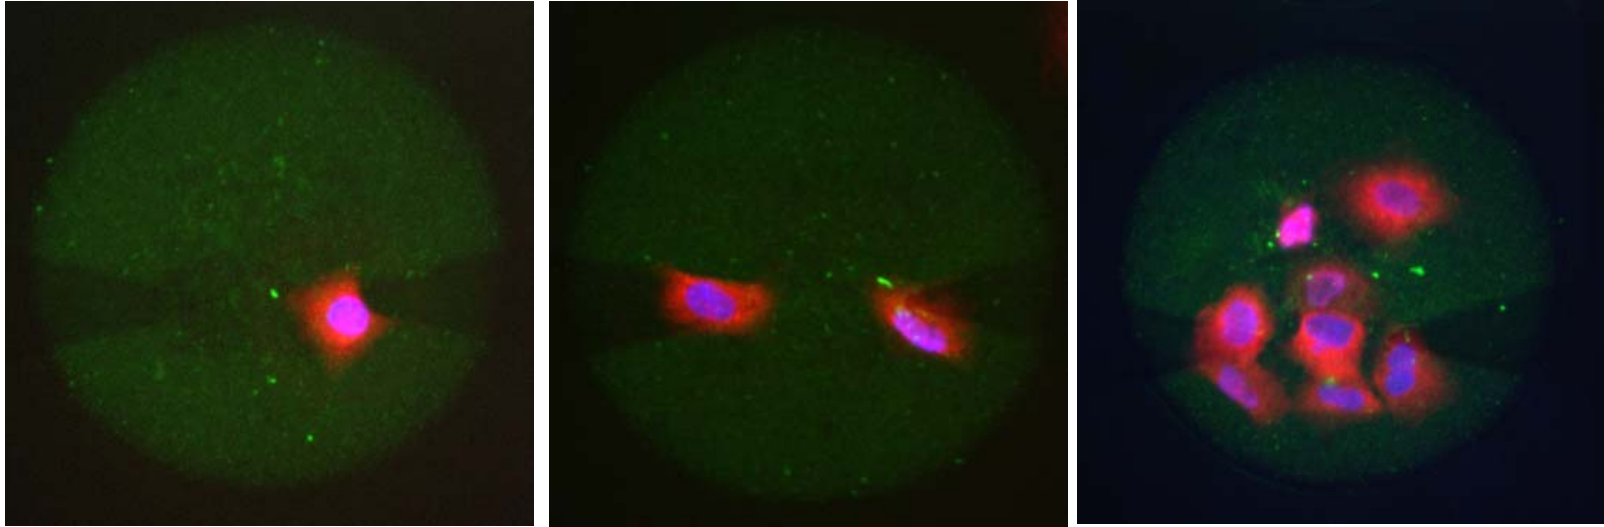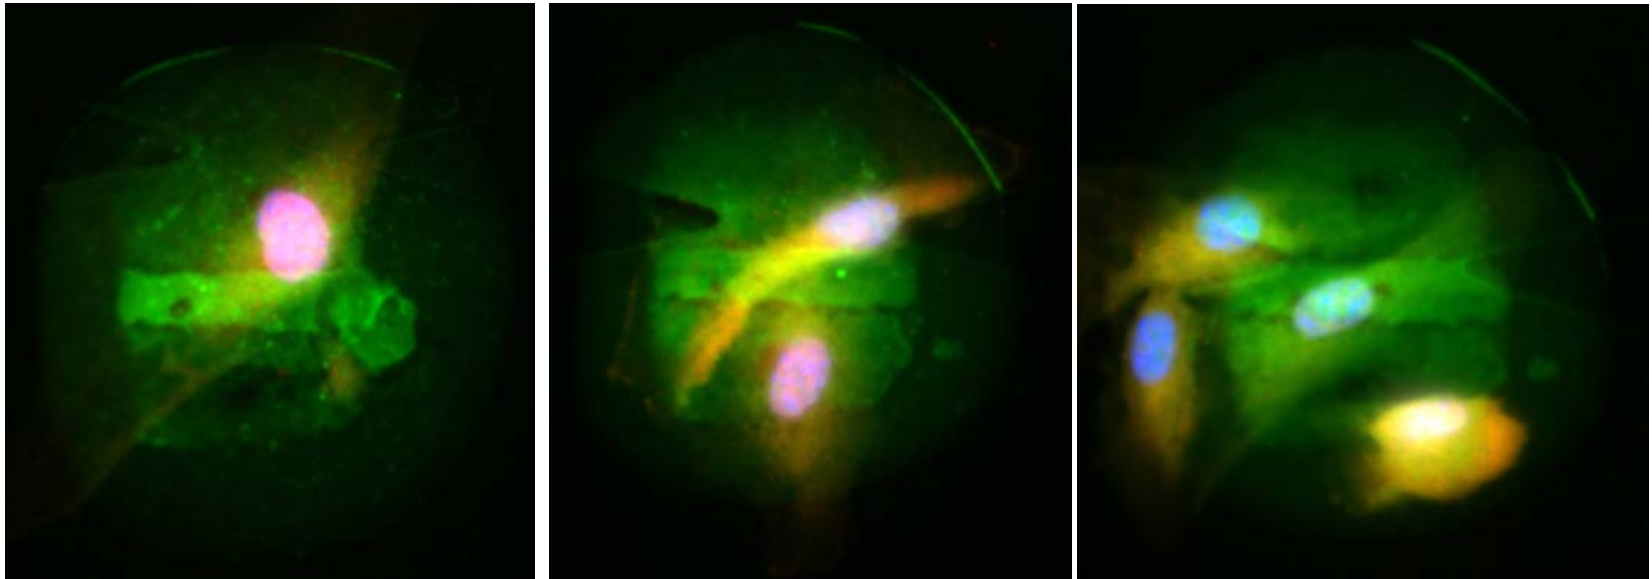

Suppl. Fig.2

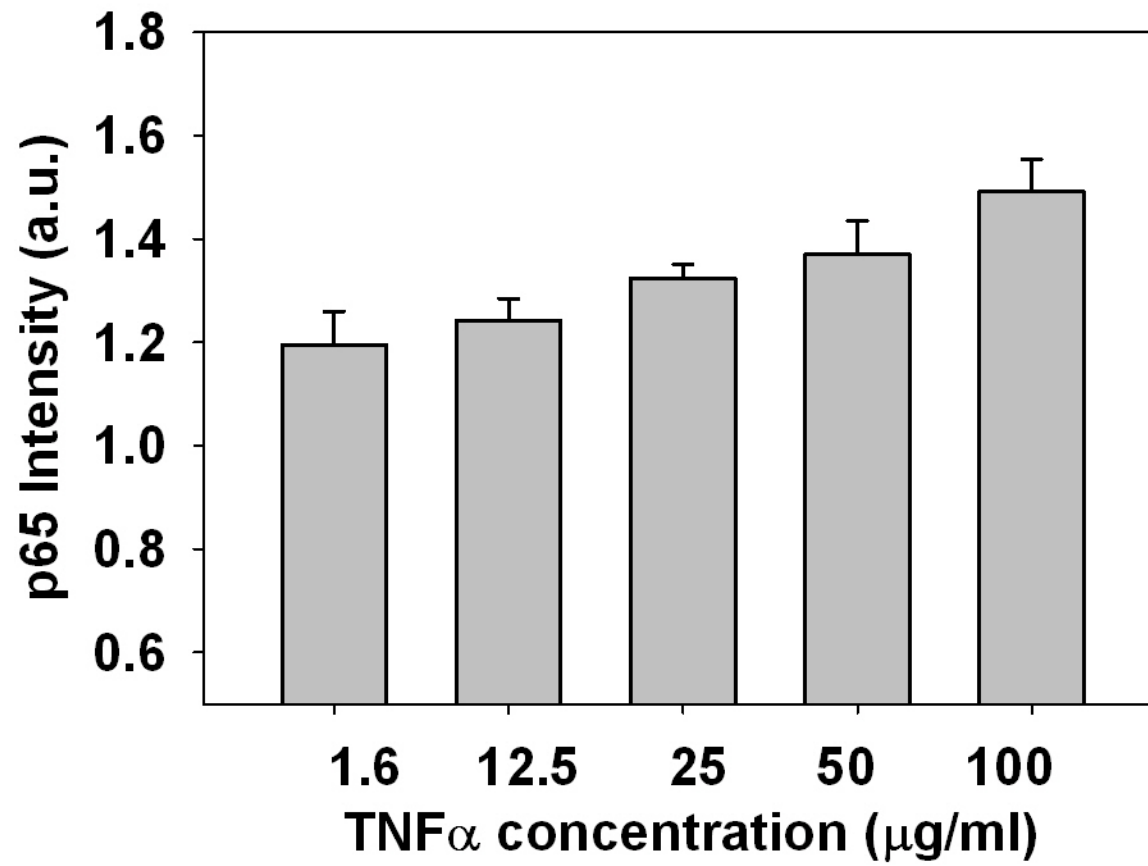

Suppl. Fig.3
